# Supplementary material
Source: ML conference proceedings conference paper supplement (https://proceedings.neurips.cc/paper_files/paper/2023/hash/dc192b3eeffebba21bd1d82f6752b84b-Abstract.html)
Supplement: Supplementary file 1 [file dc192b3eeffebba21bd1d82f6752b84b-Supplemental-Conference.pdf]

---

# DAMEX: Dataset-aware Mixture-of-Experts for visual understanding of mixture-of-datasets

Supplementary Material

---

Anonymous Author(s)

Affiliation

Address

email

1 This document provides detailed derivation for the convergence behaviour of vanilla MoE on mixture-  
2 of-datasets.

## 3 1 Mixing datasets in Vanilla MoE does not guarantee convergence with fixed 4 number of experts

5 In the main paper, we empirically show the benefits of using our proposed DAMEX against vanilla  
6 MoE when mixing multiple datasets. Here we provide theoretical evidence that vanilla MoE do not  
7 guarantee convergence when mixing multiple datasets. Hence motivating the need for our method.

8 **Problem formulation.** Consider a binary classification problem over  $P$ -patch inputs where each  
9 patch has  $d$  dimensions and label  $y = \{\pm 1\}$ . Thus, a labeled data point  $(\mathbf{x}, y)$  has input  $\mathbf{x} =$   
10  $(\mathbf{x}^{(1)}, \mathbf{x}^{(2)}, \mathbf{x}^{(3)}, \dots, \mathbf{x}^{(P)}) \in (\mathcal{R}^d)^P$  is a collection of  $P$  patch inputs with  $y$  as the data label. The  
11 data  $\mathbf{x}$  is generated from  $K$  clusters.

12 Chen et al. [2022] proves that in such a binary-classification problem, an MoE layer converges to an  
13  $o(1)$  test loss and zero training loss. Since, such a classification problem has an intrinsic clustering  
14 structure that may be utilized to achieve better performance. Examples can be divided into  $K$  clusters  
15  $\bigcup_{k \in [K]} \Omega_k$  based on the distance from the cluster-center: an example  $(\mathbf{x}, y) \in \Omega_k$  if and only if at  
16 least one patch of  $x$  aligns with cluster  $\Omega_k$ .

17 Specifically, Chen et al. [2022] Lemma 5.2 states that with data  $\mathbf{x} \in (\mathcal{R}^d)^P$  the expert  $m \in M_k$  can  
18 achieve nearly zero test error on the cluster  $\Omega_k$  but high test error on other clusters  $\Omega_{k'}, k' \neq k$ .

19 We will extend their formulation to multiple datasets  $\mathbf{x}_1$  and  $\mathbf{x}_2$  drawn from similar distribution.

20 **Lemma 1:** A mixture of two datasets  $\mathbf{x} = \mathbf{x}_1 \cup \mathbf{x}_2$ , does not always results in the convergence of a  
21 MoE layer, such that an expert  $m \in [M]$  achieve nearly zero test error on cluster  $\Omega_{k_1}$  and  $\Omega_{k_2}$  but  
22 high test error on all other clusters in both distributions  $\Omega_{k'_1}, k'_1 \neq k_1$  and  $\Omega_{k'_2}, k'_2 \neq k_2$ .

23 **Proof:** We will prove this by contradiction. Assume that we choose a  $K$ , such that VC dimension  
24 of  $[M]$  experts is equal to  $K$ . Since,  $\mathbf{x}_2 \neq \mathbf{x}_1$ , the VC dimension of a model required to learn both  
25  $\mathbf{x}_1 \cup \mathbf{x}_2$  is at least  $K + 1$ . But, our  $[M]$  experts cannot converge for more than  $K$  VC dimension.  
26 Contradiction.

27 Thus, we show that vanilla MoE does not guarantee convergence with mixture of datasets. However,  
28 if we divide the dataset-expert pair using the proposed DAMEX approach then we can ensure that  
29 each expert attends to a separate input data distribution  $x$  leading to better convergence.

## 30 **References**

- 31 Zixiang Chen, Yihe Deng, Yue Wu, Quanquan Gu, and Yanzhi Li. Towards understanding mixture  
32 of experts in deep learning. *arXiv preprint arXiv:2208.02813*, 2022.
